# Supplementary material for: Genetic characteristics of 234 Italian patients with macular and cone/cone-rod dystrophy
Source: PubMed Central journal article supplement (PMC8904500; doi:10.1038/s41598-022-07618-1), 2022-03-08
Supplement: 41598_2022_7618_MOESM1_ESM.pdf [file 41598_2022_7618_MOESM1_ESM.pdf]

## Genetic Characteristics of 234 Italian Patients with Macular and Cone/Cone-Rod

### Dystrophy.

Benedetto Falsini<sup>1,8</sup>, Giorgio Placidi<sup>1,8</sup>, Elisa De Siena<sup>1</sup>, Pietro Chiurazzi<sup>2</sup>, Angelo Maria Minnella<sup>1</sup>, Maria Cristina Savastano<sup>1</sup>, Lucia Ziccardi<sup>3</sup>, Vincenzo Parisi<sup>3</sup>, Giancarlo Iarossi<sup>4</sup>, Marcella Percio<sup>6</sup>, Barbora Piteková<sup>5</sup>, Giuseppe Marceddu<sup>7</sup>, Paolo Enrico Maltese<sup>6,9</sup>, Matteo Bertelli<sup>6,7,9</sup>

<sup>1</sup>Ophthalmology Unit, Fondazione Policlinico Universitario "A. Gemelli" IRCCS/Universita' Cattolica del S. Cuore, Rome, Italy;

<sup>2</sup>UOC Genetica Medica, Fondazione Policlinico Universitario "A. Gemelli" IRCCS & Istituto di Medicina Genomica, Universita' Cattolica del S. Cuore, Rome, Italy;

<sup>3</sup>IRCCS Fondazione Bietti, Rome, Italy;

<sup>4</sup>Ophthalmology Unit, Bambino Gesù Children's Hospital, IRCCS, Rome, Italy;

<sup>5</sup>Department of Pediatrics, National Institute of Children's Diseases, Faculty of Medicine, Comenius University Bratislava, Slovak Republic;

<sup>6</sup>MAGI'S Lab s.r.l., Rovereto, Italy;

<sup>7</sup>MAGI Euregio s.c.s., Bolzano, Italy;

<sup>8</sup>These authors contributed equally: Benedetto Falsini and Giorgio Placidi

<sup>9</sup>These authors jointly supervised this work: Paolo Enrico Maltese and Matteo Bertelli

### Address for correspondence

Dr. Paolo Enrico Maltese

Magi's Lab s.r.l., Via Delle Maioliche 57/D

38068 Rovereto (TN), Italy

Tel.: 39-0464 662771

Fax: 39-0464 425634

Email: [paolo.maltese@assomagi.org](mailto:paolo.maltese@assomagi.org)

Table S1. Genes included in custom NGS targeted sequencing panels.

| NON-SYNDROMIC IRDs            |          | CONE DYSTROPHY                |                               | MACULAR DYSTROPHY               |                                 |                               | STARGARDT DISEASE             |                               |
|-------------------------------|----------|-------------------------------|-------------------------------|---------------------------------|---------------------------------|-------------------------------|-------------------------------|-------------------------------|
| PANEL NAME<br>(PERIOD OF USE) |          | PANEL NAME<br>(PERIOD OF USE) | PANEL NAME<br>(PERIOD OF USE) | PANEL NAME<br>(PERIOD OF USE)   | PANEL NAME<br>(PERIOD OF USE)   | PANEL NAME<br>(PERIOD OF USE) | PANEL NAME<br>(PERIOD OF USE) | PANEL NAME<br>(PERIOD OF USE) |
| OCULAR<br>(2017-2019)         |          | OSS_NEW<br>(2014-2018)        | OCULAR<br>(2017-2019)         | OSS_NEW MD_Rev 0<br>(2014-2017) | OSS_NEW MD_Rev 1<br>(2017-2018) | OCULAR<br>(2017-2019)         | OSS_NEW<br>(2014-2018)        | OCULAR<br>(2017-2019)         |
| ABCA4                         | LCA5     | CNGA3                         | ABCA4                         | ABCA4                           | ABCA4                           | ABCA4                         | ABCA4                         | ABCA4                         |
| ABCB6                         | LRAT     | RAB28                         | ADAM9                         | BEST1                           | BEST1                           | BEST1                         | ELOVL4                        | CNGB3                         |
| ADAM9                         | LRIT3    | GUCY2D                        | AIP1L1                        | EFEMP1                          | C8orf37                         | C8orf37                       | PROM1                         | ELOVL4                        |
| AGBL5                         | MAK      | PROM1                         | C8orf37                       | ELOVL4                          | CRX                             | CDH3                          | PRPH2                         | PROM1                         |
| AHI1                          | MERTK    | GUCA1A                        | CACNA1F                       | IMPG1                           | EFEMP1                          | CFH                           |                               | PRPH2                         |
| AIP1L1                        | NEK2     | CERKL                         | CACNA2D4                      | IMPG2                           | ELOVL4                          | CFI                           |                               |                               |
| ARHGGEF18                     | NMNAT1   | CACNA1F                       | CDHR1                         | PROM1                           | GUCA1A                          | CRX                           |                               |                               |
| ARL2BP                        | NR2E3    | SEMA4A                        | CEP78                         | PRPH2                           | IMPG1                           | DRAM2                         |                               |                               |
| ARL6                          | NRL      | CRX                           | CFAP410                       | RP1L1                           | IMPG2                           | EFEMP1                        |                               |                               |
| ATF6                          | NYX      | AIP1L1                        | CNGA3                         | RPGR                            | PROM1                           | ELOVL4                        |                               |                               |
| BBS2                          | OFD1     | RPGRIP1                       | CRX                           | TIMP3                           | PRPH2                           | GUCA1A                        |                               |                               |
| BEST1                         | OPA1     | ABCA4                         | DRAM2                         |                                 | RAX2                            | IMPG1                         |                               |                               |
| C1QTNF5                       | OPA3     | PITPNM3                       | GUCA1A                        |                                 | RIMS1                           | IMPG2                         |                               |                               |
| C8orf37                       | OTX2     | PRPH2                         | GUCY2D                        |                                 | RLBP1                           | PRDM13                        |                               |                               |
| CA4                           | PCARE    | CNGB3                         | IFT81                         |                                 | RP1L1                           | PROM1                         |                               |                               |
| CABP4                         | PDE6A    | ADAM9                         | KCNV2                         |                                 | RPGR                            | PRPH2                         |                               |                               |
| CACNA1F                       | PDE6B    | RPGR                          | PDE6C                         |                                 | RPGR                            | RAX2                          |                               |                               |
| CACNA2D4                      | PDE6C    | CDHR1                         | PITPNM3                       |                                 | SEMA4A                          | RIMS1                         |                               |                               |
| CDH3                          | PDE6G    | RIMS1                         | POC1B                         |                                 | TIMP3                           | RLBP1                         |                               |                               |
| CDHR1                         | PDE6H    | RAX2                          | PROM1                         |                                 | TTC8                            | RP1L1                         |                               |                               |
| CEP290                        | PITPNM3  |                               | PRPH2                         |                                 |                                 | RPGR                          |                               |                               |
| CEP78                         | POC1B    |                               | RAB28                         |                                 |                                 | RPGR                          |                               |                               |
| CERKL                         | POMGNT1  |                               | RAX2                          |                                 |                                 | SEMA4A                        |                               |                               |
| CFAP410                       | PRCD     |                               | RIMS1                         |                                 |                                 | TIMP3                         |                               |                               |
| CFH                           | PROM1    |                               | RPGR                          |                                 |                                 | TTC8                          |                               |                               |
| CFI                           | PRPF3    |                               | RPGR                          |                                 |                                 |                               |                               |                               |
| CHM                           | PRPE31   |                               | RPGRIP1                       |                                 |                                 |                               |                               |                               |
| CLN3                          | PRPF4    |                               | SEMA4A                        |                                 |                                 |                               |                               |                               |
| CLRN1                         | PRPF6    |                               | TLL5                          |                                 |                                 |                               |                               |                               |
| CNGA1                         | PRPF8    |                               | UNC119                        |                                 |                                 |                               |                               |                               |
| CNGA3                         | PRPH2    |                               |                               |                                 |                                 |                               |                               |                               |
| CNGB1                         | RAB28    |                               |                               |                                 |                                 |                               |                               |                               |
| CNGB3                         | RAX2     |                               |                               |                                 |                                 |                               |                               |                               |
| CRB1                          | RBP3     |                               |                               |                                 |                                 |                               |                               |                               |
| CRX                           | RD3      |                               |                               |                                 |                                 |                               |                               |                               |
| CTNNA1                        | RDH12    |                               |                               |                                 |                                 |                               |                               |                               |
| DHDDS                         | RDH5     |                               |                               |                                 |                                 |                               |                               |                               |
| DNM1L                         | REEP6    |                               |                               |                                 |                                 |                               |                               |                               |
| DRAM2                         | RGR      |                               |                               |                                 |                                 |                               |                               |                               |
| EFEMP1                        | RHO      |                               |                               |                                 |                                 |                               |                               |                               |
| ELOVL4                        | RIMS1    |                               |                               |                                 |                                 |                               |                               |                               |
| EYS                           | RLBP1    |                               |                               |                                 |                                 |                               |                               |                               |
| FAM161A                       | ROM1     |                               |                               |                                 |                                 |                               |                               |                               |
| FLVCR1                        | RP1      |                               |                               |                                 |                                 |                               |                               |                               |
| FSCN2                         | RP1L1    |                               |                               |                                 |                                 |                               |                               |                               |
| GDF6                          | RP2      |                               |                               |                                 |                                 |                               |                               |                               |
| GNAT1                         | RP9      |                               |                               |                                 |                                 |                               |                               |                               |
| GNAT2                         | RPE65    |                               |                               |                                 |                                 |                               |                               |                               |
| GNB3                          | RPGR     |                               |                               |                                 |                                 |                               |                               |                               |
| GPRI79                        | RPGRIP1  |                               |                               |                                 |                                 |                               |                               |                               |
| GRK1                          | RS1      |                               |                               |                                 |                                 |                               |                               |                               |
| GRM6                          | SAG      |                               |                               |                                 |                                 |                               |                               |                               |
| GUCA1A                        | SEMA4A   |                               |                               |                                 |                                 |                               |                               |                               |
| GUCA1B                        | SLC24A1  |                               |                               |                                 |                                 |                               |                               |                               |
| GUCY2D                        | SLC7A14  |                               |                               |                                 |                                 |                               |                               |                               |
| HGSNAT                        | SNRNP200 |                               |                               |                                 |                                 |                               |                               |                               |
| IDH3A                         | SPATA7   |                               |                               |                                 |                                 |                               |                               |                               |
| IDH3B                         | TIMP3    |                               |                               |                                 |                                 |                               |                               |                               |
| IFT140                        | TMEM126A |                               |                               |                                 |                                 |                               |                               |                               |
| IFT172                        | TOPORS   |                               |                               |                                 |                                 |                               |                               |                               |
| IFT81                         | TRPM1    |                               |                               |                                 |                                 |                               |                               |                               |
| IMPDH1                        | TTC8     |                               |                               |                                 |                                 |                               |                               |                               |
| IMPG1                         | TLL5     |                               |                               |                                 |                                 |                               |                               |                               |
| IMPG2                         | TUUBB4B  |                               |                               |                                 |                                 |                               |                               |                               |
| IQCB1                         | TULP1    |                               |                               |                                 |                                 |                               |                               |                               |
| KCNJ13                        | UNC119   |                               |                               |                                 |                                 |                               |                               |                               |
| KCNV2                         | USH2A    |                               |                               |                                 |                                 |                               |                               |                               |
| KIZ                           | ZNF408   |                               |                               |                                 |                                 |                               |                               |                               |
| KLHL7                         | ZNF513   |                               |                               |                                 |                                 |                               |                               |                               |

**Table S2. Demographic and genetic characteristics of MD probands.**

| ID    | Sex | Age | ONSET | Gene                    | RefSeq    | Exon/<br>intron      | Nucleotide change                   | Amino acid change                                 | Allele<br>state   | dbSNP rs                                 | VAR SOME         | Transmission | REF |
|-------|-----|-----|-------|-------------------------|-----------|----------------------|-------------------------------------|---------------------------------------------------|-------------------|------------------------------------------|------------------|--------------|-----|
| MD-1  | F   | 31  | 25    | ABCA4<br>ABCA4          | NM_000350 | ex34<br>ex40         | c.4793C>A<br>c.5603A>T              | p.(Ala1598Asp)<br>p.(Asn1868Ile)                  | HET<br>HOM        | rs61750155<br>rs1801466                  | P<br>VUS/LP      | AR           | 1   |
|       |     |     |       |                         |           |                      |                                     |                                                   |                   |                                          |                  |              | 2   |
| MD-2  | F   | 33  | 24    | ABCA4<br>ABCA4          | NM_000350 | ex33<br>ex42         | c.4710del<br>c.5882G>A              | p.(Ile1571Serfs*10)<br>p.(Gly1961Glu)             | HET<br>HET        | rs281865381<br>rs1800553                 | LP<br>P          | AR           | 3   |
|       |     |     |       |                         |           |                      |                                     |                                                   |                   |                                          |                  |              | 4   |
| MD-3  | F   | 21  | 8     | ABCA4                   | NM_000350 | ex43                 | c.5917del                           | p.(Val1973*)                                      | HOM               | rs61751389                               | P                | AR           | 5   |
| MD-4  | F   | 46  | 17    | ABCA4<br>ABCA4          | NM_000350 | ex47<br>ex42         | c.6445C>T<br>c.5882G>A              | p.(Arg2149*)<br>p.(Gly1961Glu)                    | HET<br>HET        | rs61750654<br>rs1800553                  | P<br>P           | AR           | 6   |
|       |     |     |       |                         |           |                      |                                     |                                                   |                   |                                          |                  |              | 4   |
| MD-5  | F   | 74  | 25    | ABCA4<br>ABCA4          | NM_000350 | ex30<br>ex46         | c.4354G>T<br>c.6316C>T              | p.(Glu1452*)<br>p.(Arg2106Cys)                    | HET<br>HET        | rs886044742<br>rs61750648                | P<br>P           | AR           | 7   |
|       |     |     |       |                         |           |                      |                                     |                                                   |                   |                                          |                  |              | 4   |
| MD-6  | F   | 16  | 10    | ABCA4<br>ABCA4<br>ABCA4 | NM_000350 | ex34<br>ex42<br>ex3  | c.4775G>A<br>c.5882G>A<br>c.288C>A  | p.(Gly1592Asp)<br>p.(Gly1961Glu)<br>p.(Asn96Lys)  | HET<br>HET<br>HET | rs1425552175<br>rs1800553<br>rs886039297 | P<br>P<br>LP     | AR           | 8   |
|       |     |     |       |                         |           |                      |                                     |                                                   |                   |                                          |                  |              | 4   |
|       |     |     |       |                         |           |                      |                                     |                                                   |                   |                                          |                  |              | 9   |
| MD-7  | M   | 34  | 23    | ABCA4                   | NM_000350 | ex43                 | c.5917del                           | p.(Val1973*)                                      | HOM               | rs61751389                               | P                | AR           | 5   |
| MD-8  | F   | 45  | NA    | ABCA4<br>ABCA4          | NM_000350 | ex6<br>ex24<br>ex42  | c.667A>C<br>c.3607G>A<br>c.5882G>A  | p.(Lys223Gln)<br>p.(Gly1203Arg)<br>p.(Gly1961Glu) | HET<br>HET<br>HET | rs147619585<br>rs1064793011<br>rs1800553 | VUS/LP<br>P<br>P | AR           | 9   |
|       |     |     |       |                         |           |                      |                                     |                                                   |                   |                                          |                  |              | 9   |
|       |     |     |       |                         |           |                      |                                     |                                                   |                   |                                          |                  |              | 4   |
| MD-9  | M   | 20  | NA    | ABCA4<br>ABCA4          | NM_000350 | ex15<br>ex42         | c.2300T>A<br>c.5882C>A              | p.(Val767Asp)<br>p.(Gly1961Glu)                   | HET<br>HET        | rs61751395<br>rs1800553                  | P<br>P           | AR           | 10  |
|       |     |     |       |                         |           |                      |                                     |                                                   |                   |                                          |                  |              | 4   |
| MD-10 | M   | 43  | 20    | ABCA4<br>ABCA4          | NM_000350 | ex1<br>ex42          | c.61C>T<br>c.5882G>A                | p.(Gln21*)<br>p.(Gly1961Glu)                      | HET<br>HET        | rs770272033<br>rs1800553                 | P<br>P           | AR           | 11  |
|       |     |     |       |                         |           |                      |                                     |                                                   |                   |                                          |                  |              | 4   |
| MD-11 | M   | 32  | 12    | ABCA4<br>ABCA4          | NM_000350 | ex22<br>ex22         | c.3295T>C<br>c.3259G>A              | p.(Ser1099Pro)<br>p.(Glu1087Lys)                  | HET<br>HET        | rs61750119<br>rs61751398                 | LP<br>P          | AR           | 12  |
|       |     |     |       |                         |           |                      |                                     |                                                   |                   |                                          |                  |              | 4   |
| MD-12 | M   | 25  | 15    | ABCA4<br>ABCA4<br>ABCA4 | NM_000350 | ex16<br>ex42<br>ex16 | c.2461T>A<br>c.5882G>A<br>c.2549A>G | p.(Trp821Arg)<br>p.(Gly1961Glu)<br>p.(Tyr850Cys)  | HET<br>HET<br>HET | rs61749433<br>rs1800553<br>rs143797418   | P<br>P<br>LP     | AR           | 6   |
|       |     |     |       |                         |           |                      |                                     |                                                   |                   |                                          |                  |              | 4   |
|       |     |     |       |                         |           |                      |                                     |                                                   |                   |                                          |                  |              | 13  |
| MD-13 | M   | 30  | 6     | ABCA4<br>ABCA4<br>ABCA4 | NM_000350 | ex6<br>ex38<br>ex5   | c.634C>T<br>c.5318C>T<br>c.514G>A   | p.(Arg212Cys)<br>p.(Ala1773Val)<br>p.(Gly172Ser)  | HET<br>HET<br>HET | rs61750200<br>rs760549861<br>rs61748532  | P<br>P<br>VUS/LP | AR           | 14  |
|       |     |     |       |                         |           |                      |                                     |                                                   |                   |                                          |                  |              | 15  |
|       |     |     |       |                         |           |                      |                                     |                                                   |                   |                                          |                  |              | 3   |
| MD-14 | M   | 50  | 37    | ABCA4<br>ABCA4          | NM_000350 | int35<br>ex42        | c.5018+2T>C<br>c.5882G>A            | P.(?)<br>p.(Gly1961Glu)                           | HET<br>HET        | rs61750562<br>rs1800553                  | P<br>P           | AR           | 16  |
|       |     |     |       |                         |           |                      |                                     |                                                   |                   |                                          |                  |              | 4   |
| MD-15 | F   | 30  | 13    | ABCA4<br>ABCA4          | NM_000350 | ex33<br>ex42         | c.4734_4739delinsCC<br>c.5882G>A    | p.(Phe1579Glnfs*8)<br>p.(Gly1961Glu)              | HET<br>HET        | NA<br>rs1800553                          | P<br>P           | AR           | NEW |
|       |     |     |       |                         |           |                      |                                     |                                                   |                   |                                          |                  |              | 4   |
| MD-16 | F   | 22  | 15    | ABCA4<br>ABCA4          | NM_000350 | ex12<br>ex21<br>ex40 | c.1622T>C<br>c.3113C>T<br>c.5692C>T | p.(Leu541Pro)<br>p.(Ala1038Val)<br>p.(Arg1898Cys) | HET<br>HET<br>HET | rs61751392<br>rs61751374<br>rs201357151  | P<br>P<br>VUS/LP | AR           | 17  |
|       |     |     |       |                         |           |                      |                                     |                                                   |                   |                                          |                  |              | 4   |
|       |     |     |       |                         |           |                      |                                     |                                                   |                   |                                          |                  |              | 18  |
| MD-17 | M   | 56  | 23    | ABCA4<br>ABCA4          | NM_000350 | ex28<br>ex42         | c.4217del<br>c.5882G>A              | p.(His1406Profs*29)<br>p.(Gly1961Glu)             | HET<br>HET        | NA<br>rs1800553                          | P<br>P           | AR           | NEW |
|       |     |     |       |                         |           |                      |                                     |                                                   |                   |                                          |                  |              | 4   |
| MD-18 | F   | 51  | 38    | ABCA4<br>ABCA4          | NM_000350 | ex34<br>ex48         | c.4793C>A<br>c.6721C>G              | p.(Ala1598Asp)<br>p.(Leu2241Val)                  | HET<br>HET        | rs61750155<br>rs61748521                 | P<br>LP          | AR           | 1   |
|       |     |     |       |                         |           |                      |                                     |                                                   |                   |                                          |                  |              | 5   |
| MD-19 | M   | 64  | NA    | ABCA4<br>ABCA4          | NM_000350 | ex20<br>ex22         | c.2971G>C<br>c.3259G>A              | p.(Gly991Arg)<br>p.(Glu1087Lys)                   | HET<br>HET        | rs61750129<br>rs61751398                 | P<br>P           | AR           | 3   |
|       |     |     |       |                         |           |                      |                                     |                                                   |                   |                                          |                  |              | 4   |
| MD-20 | F   | 17  | NA    | ABCA4<br>ABCA4          | NM_000350 | ex19<br>ex47         | c.2888G>T<br>c.6449G>A              | p.(Gly963Val)<br>p.(Cys2150Tyr)                   | HET<br>HET        | NA<br>rs61751384                         | LP<br>P          | AR           | 19  |
|       |     |     |       |                         |           |                      |                                     |                                                   |                   |                                          |                  |              | 20  |

|       |   |    |    |                         |           |                      |                                     |                                                      |                   |                                        |                  |    |                |
|-------|---|----|----|-------------------------|-----------|----------------------|-------------------------------------|------------------------------------------------------|-------------------|----------------------------------------|------------------|----|----------------|
| MD-21 | M | 53 | 20 | ABCA4<br>ABCA4<br>ABCA4 | NM_000350 | ex9<br>ex33<br>ex42  | c.1222C>T<br>c.4710del<br>c.5882G>A | p.(Arg408*)<br>p.(Ile1571Serfs*10)<br>p.(Gly1961Glu) | HET<br>HET<br>HET | rs61748550<br>rs281865381<br>rs1800553 | P<br>LP<br>P     | AR | 21<br>3<br>4   |
| MD-22 | F | 52 | 18 | ABCA4<br>ABCA4<br>ABCA4 | NM_000350 | ex30<br>ex42<br>ex9  | c.4462T>C<br>c.5882G>A<br>c.1140T>A | p.(Cys1488Arg)<br>p.(Gly1961Glu)<br>p.(Asn380Lys)    | HET<br>HET<br>HET | rs61750146<br>rs1800553<br>rs61748549  | P<br>P<br>LP     | AR | 6<br>4<br>22   |
| MD-23 | F | 19 | 9  | ABCA4                   | NM_000350 | ex3                  | c.288C>A                            | p.(Asn96Lys)                                         | HOM               | rs886039297                            | LP               | AR | 9              |
| MD-24 | F | 20 | 16 | ABCA4<br>ABCA4          | NM_000350 | ex38<br>ex42         | c.5384T>G<br>c.5882G>A              | p.(Leu1795*)<br>p.(Gly1961Glu)                       | HET<br>HET        | NA<br>rs1800553                        | P<br>P           | AR | NEW<br>4       |
| MD-25 | M | 29 | 1  | ABCA4<br>ABCA4          | NM_000350 | ex21<br>ex22         | c.3167A>T<br>c.3289A>G              | p.(Asn1056Ile)<br>p.(Arg1097Gly)                     | HET<br>HET        | NA<br>NA                               | LP<br>LP         | AR | NEW<br>NEW     |
| MD-26 | F | 32 | NA | ABCA4<br>ABCA4          | NM_000350 | ex22<br>ex42         | c.3289A>T<br>c.5882G>A              | p.(Arg1097*)<br>p.(Gly1961Glu)                       | HET<br>HET        | rs886044731<br>rs1800553               | P<br>P           | AR | 23<br>4        |
| MD-27 | M | 53 | 13 | ABCA4<br>ABCA4          | NM_000350 | ex22<br>ex17         | c.3210_3211dupGT<br>c.2640G>C       | p.(Ser1071Cysfs*14)<br>p.(Trp880Cys)                 | HET<br>HET        | rs387906385<br>NA                      | P<br>VUS/LP      | AR | 4<br>24        |
| MD-28 | M | 23 | 15 | ABCA4<br>ABCA4          | NM_000350 | ex13<br>ex42         | c.1819G>A<br>c.5882G>A              | p.(Gly607Arg)<br>p.(Gly1961Glu)                      | HET<br>HET        | rs61749412<br>rs1800553                | LP<br>P          | AR | 5<br>4         |
| MD-29 | F | 14 | 10 | ABCA4<br>ABCA4          | NM_000350 | ex1<br>ex19          | c.61C>T<br>c.2774G>A                | p.(Gln21*)<br>p.(Trp925*)                            | HET<br>HET        | rs770272033<br>NA                      | P<br>P           | AR | 11<br>25       |
| MD-30 | M | 24 | 13 | ABCA4<br>ABCA4          | NM_000350 | int30<br>ex36        | c.4539+1G>T<br>c.5087G>A            | p.(?)<br>p.(Ser1696Asn)                              | HET<br>HET        | rs61751388<br>rs61750564               | P<br>P           | AR | 26<br>6        |
| MD-31 | M | 45 | NA | ABCA4<br>ABCA4<br>ABCA4 | NM_000350 | ex13<br>ex42<br>ex5  | c.1819G>A<br>c.5882G>A<br>c.466A>G  | p.(Gly607Arg)<br>p.(Gly1961Glu)<br>p.(Ile156Val)     | HET<br>HET<br>HET | rs61749412<br>rs1800553<br>rs62646863  | LP<br>P<br>LP    | AR | 5<br>4<br>17   |
| MD-32 | F | 42 | 35 | ABCA4<br>ABCA4          | NM_000350 | ex44<br>ex42         | c.6088C>T<br>c.5882G>A              | p.(Arg2030*)<br>p.(Gly1961Glu)                       | HET<br>HET        | rs61751383<br>rs1800553                | P<br>P           | AR | 6<br>4         |
| MD-33 | M | 21 | NA | ABCA4<br>ABCA4          | NM_000350 | ex19<br>ex42         | c.2768del<br>c.5882G>A              | p.(Pro923Glnfs*9)<br>p.(Gly1961Glu)                  | HET<br>HET        | NA<br>rs1800553                        | LP<br>P          | AR | 27<br>4        |
| MD-34 | M | 45 | 10 | ABCA4<br>ABCA4          | NM_000350 | ex4<br>ex42          | c.428C>T<br>c.5882G>A               | p.(Pro143Leu)<br>p.(Gly1961Glu)                      | HET<br>HET        | rs62646860<br>rs1800553                | P<br>P           | AR | 3<br>4         |
| MD-35 | F | 29 | NA | ABCA4<br>ABCA4          | NM_000350 | int13<br>int40       | c.1937+1G>A<br>c.5714+5G>A          | p.(?)<br>p.(Glu1863Leufs*33)                         | HET<br>HET        | rs61752401<br>rs61751407               | P<br>P           | AR | 5<br>28        |
| MD-36 | M | 33 | 19 | ABCA4<br>ABCA4<br>ABCA4 | NM_000350 | ex43<br>ex44<br>ex27 | c.5908C>T<br>c.6089G>A<br>c.4085G>T | p.(Leu1970Phe)<br>p.(Arg2030Gln)<br>p.(Arg1362Ile)   | HET<br>HET<br>HET | rs28938473<br>rs61750641<br>NA         | P<br>P<br>VUS/LP | AR | 17<br>6<br>NEW |
| MD-37 | M | 37 | 11 | ABCA4<br>ABCA4          | NM_000350 | ex22<br>ex14         | c.3289A>T<br>c.1957C>T              | p.(Arg1097*)<br>p.(Arg653Cys)                        | HET<br>HET        | rs886044731<br>rs61749420              | P<br>P           | AR | 23<br>9        |
| MD-38 | M | 13 | NA | ABCA4<br>ABCA4          | NM_000350 | int36<br>ex35        | c.5196+1G>A<br>c.4919G>A            | p.(?)<br>p.(Arg1640Gln)                              | HET<br>HET        | rs61751377<br>rs61751403               | P<br>P           | AR | 4<br>10        |
| MD-39 | M | 35 | 14 | ABCA4<br>ABCA4          | NM_000350 | ex35<br>ex47         | c.4956T>G<br>c.6446G>T              | p.(Tyr1652*)<br>p.(Arg2149Leu)                       | HET<br>HET        | rs61750561<br>rs61750655               | LP<br>LP         | AR | 12<br>12       |
| MD-40 | F | 37 | 9  | ABCA4<br>ABCA4          | NM_000350 | ex13<br>ex42         | c.1844T>C<br>c.5882G>A              | p.(Val615Ala)<br>p.(Gly1961Glu)                      | HET<br>HET        | NA<br>rs1800553                        | LP<br>P          | AR | 29<br>4        |
| MD-41 | F | 87 | 12 | ABCA4<br>ABCA4          | NM_000350 | ex45<br>ex34         | c.6184_6188del<br>c.4793C>A         | p.(Val2062Argfs*33)<br>p.(Ala1598Asp)                | HET<br>HET        | NA<br>rs61750155                       | P<br>P           | AR | NEW<br>1       |
| MD-42 | F | 48 | 24 | ABCA4<br>ABCA4          | NM_000350 | ex43<br>ex42         | c.5910_5912dup<br>c.5882G>A         | p.(Leu1971dup)<br>p.(Gly1961Glu)                     | HET<br>HET        | NA<br>rs1800553                        | LP<br>P          | AR | NEW<br>4       |

|              |   |    |    |                         |           |                      |                                                         |                                                                      |                   |                                         |               |    |                |
|--------------|---|----|----|-------------------------|-----------|----------------------|---------------------------------------------------------|----------------------------------------------------------------------|-------------------|-----------------------------------------|---------------|----|----------------|
| MD-43        | F | 64 | 52 | ABCA4<br>ABCA4<br>ABCA4 | NM_000350 | ex19<br>ex42<br>ex16 | c.2875A>G<br>c.5882G>A<br>c.2549A>G                     | p.(Thr959Ala)<br>p.(Gly1961Glu)<br>p.(Tyr850Cys)                     | HET<br>HET<br>HET | rs368846708<br>rs1800553<br>rs143797418 | LP<br>P<br>LP | AR | NEW<br>4<br>13 |
| <b>MD-44</b> | F | 18 | 12 | ABCA4<br>ABCA4          | NM_000350 | ex43<br>ex42         | c.5917del<br>c.5882G>A                                  | p.(Val1973*)<br>p.(Gly1961Glu)                                       | HET<br>HET        | rs61751389<br>rs1800553                 | P<br>P        | AR | 5<br>4         |
| <b>MD-45</b> | F | 36 | 24 | ABCA4<br>ABCA4          | NM_000350 | ex43<br>ex42         | c.5959_5964delinsTG<br>c.5882G>A                        | p.(Gly1987*)<br>p.(Gly1961Glu)                                       | HET<br>HET        | NA<br>rs1800553                         | P<br>P        | AR | NEW<br>4       |
| MD-46        | M | 62 | 20 | ABCA4<br>ABCA4          | NM_000350 | ex19<br>ex42         | c.2780C>T<br>c.5882G>A                                  | p.(Pro927Leu)<br>p.(Gly1961Glu)                                      | HET<br>HET        | NA<br>rs1800553                         | VUS/LP<br>P   | AR | NEW<br>4       |
| MD-47        | F | 11 | 6  | ABCA4<br>ABCA4          | NM_000350 | ex43<br>ex22         | c.5917del<br>c.3259G>A                                  | p.(Val1973*)<br>p.(Glu1087Lys)                                       | HET<br>HET        | rs61751389<br>rs61751398                | P<br>P        | AR | 5<br>4         |
| MD-48        | M | 57 | 12 | ABCA4<br><br>ABCA4      | NM_000350 | ex27<br><br>ex42     | c.3999_4000insACCCCAGA<br>GCCAGAGTGCCAGCCT<br>c.5882G>A | p.(Pro1333_Pro1334insThrPro<br>GluProGluCysGlnPro)<br>p.(Gly1961Glu) | HET<br><br>HET    | NA<br><br>rs1800553                     | LP<br><br>P   | AR | NEW<br><br>4   |
| <b>MD-49</b> | M | 23 | 18 | ABCA4<br>ABCA4          | NM_000350 | intron6<br>ex42      | c.571-2A>T<br>c.5882G>A                                 | p.(?)<br>p.(Gly1961Glu)                                              | HET<br>HET        | rs61748534<br>rs1800553                 | P<br>P        | AR | 30<br>4        |
| MD-50        | M | 58 | 53 | ABCA4<br>ABCA4          | NM_000350 | ex14<br>ex48         | c.2099G>A<br>c.6721C>G                                  | p.(Trp700*)<br>p.(Leu2241Val)                                        | HET<br>HET        | rs61749425<br>rs61748521                | P<br>LP       | AR | 12<br>5        |
| MD-51        | M | 47 | 16 | ABCA4<br>ABCA4          | NM_000350 | ex45<br>ex42         | c.6220G>A<br>c.5882G>A                                  | p.(Gly2074Ser)<br>p.(Gly1961Glu)                                     | HET<br>HET        | NA<br>rs1800553                         | LP<br>P       | AR | 27<br>4        |
| MD-52        | M | 36 | 32 | ABCA4<br>ABCA4          | NM_000350 | int45<br>ex42        | c.6282+1G>C<br>c.5882G>A                                | p.(?)<br>p.(Gly1961Glu)                                              | HET<br>HET        | rs770453727<br>rs1800553                | P<br>P        | AR | 27<br>4        |
| MD-53        | M | 60 | 53 | ABCA4<br>ABCA4          | NM_000350 | ex12<br>ex42         | c.1757A>G<br>c.5882G>A                                  | p.(Asp586Gly)<br>p.(Gly1961Glu)                                      | HET<br>HET        | rs1553192682<br>rs1800553               | LP<br>P       | AR | 31<br>4        |
| MD-54        | F | 34 | 19 | ABCA4<br>ABCA4          | NM_000350 | ex43<br>ex44         | c.5942C>G<br>c.6089G>A                                  | p.(Thr1981Arg)<br>p.(Arg2030Gln)                                     | HET<br>HET        | rs752147871<br>rs61750641               | P<br>P        | AR | 7<br>6         |
| MD-55        | F | 14 | 11 | ABCA4<br>ABCA4          | NM_000350 | intron6<br>ex42      | c.571-2A>T<br>c.5882G>A                                 | p.(?)<br>p.(Gly1961Glu)                                              | HET<br>HET        | rs61748534<br>rs1800553                 | P<br>P        | AR | 30<br>4        |
| MD-56        | F | 16 | 12 | ABCA4<br>ABCA4          | NM_000350 | ex44<br>int40        | c.6088C>T<br>c.5714+5G>A                                | p.(Arg2030*)<br>p.(Glu1863Leufs*33)                                  | HET<br>HET        | rs61751383<br>rs61751407                | P<br>P        | AR | 6<br>28        |
| MD-57        | F | 46 | 35 | ABCA4<br>ABCA4          | NM_000350 | ex19<br>ex42         | c.2860T>G<br>c.5882G>A                                  | p.(Tyr954Asp)<br>p.(Gly1961Glu)                                      | HET<br>HET        | rs61749447<br>rs1800553                 | LP<br>P       | AR | 12<br>4        |
| <b>MD-58</b> | F | 39 | 17 | ABCA4<br>ABCA4          | NM_000350 | ex35<br>ex34         | c.4956T>G<br>c.4793C>A                                  | p.(Tyr1652*)<br>p.(Ala1598Asp)                                       | HET<br>HET        | rs61750561<br>rs61750155                | LP<br>P       | AR | 12<br>1        |
| MD-59        | M | 37 | 6  | ABCA4<br>ABCA4          | NM_000350 | ex21<br>ex42         | c.3064G>A<br>c.5882G>A                                  | p.(Glu1022Lys)<br>p.(Gly1961Glu)                                     | HET<br>HET        | rs61749459<br>rs1800553                 | P<br>P        | AR | 12<br>4        |
| MD-60        | F | 75 | 55 | ABCA4<br>ABCA4          | NM_000350 | ex3<br>ex42          | c.247_250dup<br>c.5882G>A                               | p.(Ser84Thrfs*16)<br>p.(Gly1961Glu)                                  | HET<br>HET        | rs1005271380<br>rs1800553               | P<br>P        | AR | 10<br>4        |
| <b>MD-61</b> | M | 14 | 7  | ABCA4<br>ABCA4          | NM_000350 | ex3<br>ex28          | c.247_250dup<br>c.4139C>T                               | p.(Ser84Thrfs*16)<br>p.(Pro1380Leu)                                  | HET<br>HET        | rs1005271380<br>rs61750130              | P<br>P        | AR | 10<br>6        |
| <b>MD-62</b> | F | 8  | 5  | <i>BEST1</i>            | NM_004183 | ex7                  | c.718_720dup                                            | p.(Val240dup)                                                        | HET               | NA                                      | LP            | AD | NEW            |
| MD-63        | M | 65 | 62 | <i>BEST1</i>            | NM_004183 | ex4                  | c.436G>A                                                | p.(Ala146Thr)                                                        | HET               | rs1237501081                            | LP            | AD | 32             |
| MD-64        | M | 44 | NA | <i>BEST1</i>            | NM_004183 | ex4                  | c.278G>C                                                | p.(Trp93Ser)                                                         | HET               | NA                                      | P             | AD | 33             |
| MD-65        | M | 44 | 9  | <i>BEST1</i>            | NM_004183 | ex6                  | c.652C>A                                                | p.(Arg218Ser)                                                        | HET               | rs281865238                             | P             | AD | 34             |

|              |   |    |    |               |           |      |           |               |     |              |        |    |     |
|--------------|---|----|----|---------------|-----------|------|-----------|---------------|-----|--------------|--------|----|-----|
| MD-66        | F | 15 | 8  | <i>BEST1</i>  | NM_004183 | ex5  | c.544T>C  | p.(Trp182Arg) | HET | rs1565390925 | LP     | AD | 33  |
| MD-67        | F | 15 | 4  | <i>BEST1</i>  | NM_004183 | ex2  | c.44G>A   | p.(Gly15Asp)  | HET | rs766379510  | LP     | AD | 35  |
| MD-68        | F | 15 | NA | <i>BEST1</i>  | NM_004183 | ex6  | c.652C>T  | p.(Arg218Cys) | HET | rs281865238  | P      | AD | 34  |
| MD-69        | M | 55 | 46 | <i>CFI</i>    | NM_000204 | ex13 | c.1573T>C | p.(Ser525Pro) | HET | NA           | VUS/LP | AD | NEW |
| MD-70        | F | 47 | 8  | <i>GUCY2D</i> | NM_000180 | ex13 | c.2480A>C | p.(Tyr827Ser) | HET | NA           | VUS/LP | AD | NEW |
| MD-71        | F | 54 | 45 | <i>PRPH2</i>  | NM_000322 | ex2  | c.583C>T  | p.(Arg195*)   | HET | rs1322278463 | P      | AD | 36  |
| MD-72        | F | 49 | 38 | <i>PRPH2</i>  | NM_000322 | ex2  | c.652T>C  | p.(Ser218Pro) | HET | rs1582764878 | LP     | AD | 37  |
| MD-73        | F | 50 | 44 | <i>PRPH2</i>  | NM_000322 | ex2  | c.668T>A  | p.(Ile223Asn) | HET | NA           | P      | AD | 38  |
| MD-74        | M | 57 | 39 | <i>PRPH2</i>  | NM_000322 | ex1  | c.515G>A  | p.(Arg172Gln) | HET | rs61755793   | P      | AD | 39  |
| MD-75        | M | 56 | NA | <i>PRPH2</i>  | NM_000322 | ex1  | c.499G>A  | p.(Gly167Ser) | HET | rs527236098  | P      | AD | 40  |
| <b>MD-76</b> | M | 54 | 17 | <i>PRPH2</i>  | NM_000322 | ex1  | c.514C>T  | p.(Arg172Trp) | HET | rs61755792   | P      | AD | 39  |
| <b>MD-77</b> | F | 53 | 48 | <i>PRPH2</i>  | NM_000322 | ex1  | c.499G>A  | p.(Gly167Ser) | HET | rs527236098  | P      | AD | 40  |
| MD-78        | F | 50 | 41 | <i>PRPH2</i>  | NM_000322 | ex1  | c.515G>A  | p.(Arg172Gln) | HET | rs61755793   | P      | AD | 39  |
| MD-79        | M | 50 | 46 | <i>PRPH2</i>  | NM_000322 | ex1  | c.499G>A  | p.(Gly167Ser) | HET | rs527236098  | P      | AD | 40  |
| MD-80        | F | 45 | 34 | <i>RP1L1</i>  | NM_178857 | ex2  | c.563T>C  | p.(Leu188Pro) | HET | NA           | VUS/LP | AD | NEW |

Legend: AD, autosomal dominant; AR, autosomal recessive; HET, heterozygous; HOM, homozygous; F, female; M, male; ex, exon; int, intron; in **bold**, segregation performed; in *italics*, *in cis* variants; NA, not available; UNK, unknown; VUS, variant of unknown significance; LP, likely pathogenic; P, pathogenic.

**Table S3. Demographic and genetic characteristics of CD and CRD probands.**

| ID        | Sex | Age | Genetic class | ONSET | Gene                             | RefSeq    | Exon/intron                  | Nucleotide change                                | Amino acid change                                                  | Allele state             | dbSNP rs                                      | VARSOME                    | Transmission | REF                 |
|-----------|-----|-----|---------------|-------|----------------------------------|-----------|------------------------------|--------------------------------------------------|--------------------------------------------------------------------|--------------------------|-----------------------------------------------|----------------------------|--------------|---------------------|
| CD/CRD-1  | F   | 66  | CD            | 8     | ABCA4<br>ABCA4<br>ABCA4          | NM_000350 | ex34<br>ex42<br>ex3          | c.4793C>A<br>c.5882G>A<br>c.288C>A               | p.(Ala1598Asp)<br>p.(Gly1961Glu)<br>p.(Asn96Lys)                   | HET<br>HET<br>HET        | rs61750155<br>rs1800553<br>rs886039297        | P<br>P<br>LP               | AR           | 1<br>4<br>9         |
| CD/CRD-2  | F   | 44  | CRD           | NA    | ABCA4<br>ABCA4                   | NM_000350 | ex10<br>ex15                 | c.52C>T<br>c.2300T>A                             | p.(Arg181Trp)<br>p.(Val767Asp)                                     | HET<br>HET               | rs121909205<br>rs61751395                     | P<br>P                     | AR           | 14<br>10            |
| CD/CRD-3  | F   | 67  | CRD           | NA    | ABCA4<br>ABCA4<br>ABCA4<br>ABCA4 | NM_000350 | ex12<br>ex21<br>ex11<br>ex37 | c.1622T>C<br>c.3113C>T<br>c.1522C>T<br>c.5261A>G | p.(Leu541Pro)<br>p.(Ala1038Val)<br>p.(Arg508Cys)<br>p.(Tyr1754Cys) | HET<br>HET<br>HET<br>HET | rs61751392<br>rs61751374<br>rs138157885<br>NA | P<br>P<br>VUS/LP<br>VUS/LP | AR           | 17<br>4<br>41<br>27 |
| CD/CRD-4  | M   | 65  | CRD           | 15    | ABCA4<br>ABCA4                   | NM_000350 | ex34<br>ex31                 | c.4793C>A<br>c.4577C>T                           | p.(Ala1598Asp)<br>p.(Thr1526Met)                                   | HET<br>HET               | rs61750155<br>rs61750152                      | P<br>P                     | AR           | 1<br>17             |
| CD/CRD-5  | F   | 25  | CD            | 17    | ABCA4<br>ABCA4<br>ABCA4          | NM_000350 | ex43<br>ex42<br>ex43         | c.5961_5964del<br>c.5882G>A<br>c.5959G>T         | p.(Asp1988Profs*3)<br>p.(Gly1961Glu)<br>p.(Gly1987Trp)             | HET<br>HET<br>HET        | rs61750640<br>rs1800553<br>NA                 | P<br>P<br>LP               | AR           | 12<br>4<br>NEW      |
| CD/CRD-6  | F   | 38  | CD            | 11    | ABCA4<br>ABCA4                   | NM_000350 | ex29<br>ex25                 | c.4346G>A<br>c.3806T>C                           | p.(Trp1449*)<br>p.(Leu1269Pro)                                     | HET<br>HET               | rs61750143<br>NA                              | P<br>VUS/LP                | AR           | 6<br>27             |
| CD/CRD-7  | M   | 67  | CRD           | 16    | ABCA4<br>ABCA4                   | NM_000350 | ex14<br>ex37                 | c.1957C>T<br>c.5285C>A                           | p.(Arg653Cys)<br>p.(Ala1762Asp)                                    | HET<br>HET               | rs61749420<br>rs121909206                     | P<br>LP                    | AR           | 9<br>9              |
| CD/CRD-8  | F   | 8   | CD            | 5     | ABCA4<br>ABCA4                   | NM_000350 | int35<br>ex47                | c.5018+2T>C<br>c.6449G>A                         | p.(?)<br>p.(Cys2150Tyr)                                            | HET<br>HET               | rs61750562<br>rs61751384                      | P<br>P                     | AR           | 16<br>20            |
| CD/CRD-9  | M   | 66  | CD            | 50    | ABCA4<br>ABCA4                   | NM_000350 | ex1-5<br>ex38                | c.1-?_571-?del<br>c.5329A>T                      | p.(?)<br>p.(Met1777Leu)                                            | HET<br>HET               | NA<br>rs375184282                             | P<br>VUS/LP                | AR           | NEW<br>27           |
| CD/CRD-10 | M   | 16  | CD            | 5     | ABCA4<br>ABCA4<br>ABCA4          | NM_000350 | ex12<br>int9<br>ex21         | c.1622T>C<br>c.1239+1G>C<br>c.3113C>T            | p.(Leu541Pro)<br>p.(?)<br>p.(Ala1038Val)                           | HET<br>HET<br>HET        | rs61751392<br>rs765707028<br>rs61751374       | P<br>P<br>P                | AR           | 17<br>4<br>4        |
| CD/CRD-11 | F   | 42  | CD            | 21    | ABCA4<br>ABCA4                   | NM_000350 | int5<br>ex36                 | c.571-1G>T<br>c.5087G>A                          | p.(?)<br>p.(Ser1696Asn)                                            | HET<br>HET               | rs61748533<br>rs61750564                      | P<br>P                     | AR           | 12<br>6             |
| CD/CRD-12 | F   | 16  | CRD           | 13    | ABCA4<br>ABCA4                   | NM_000350 | int36<br>ex25                | c.5196+1G>A<br>c.3813G>C                         | p.(?)<br>p.(Glu1271Asp)                                            | HET<br>HET               | rs61751377<br>NA                              | P<br>P                     | AR           | 4                   |
| CD/CRD-13 | F   | 53  | CRD           | 20    | ABCA4<br>ABCA4                   | NM_000350 | ex4<br>ex42                  | c.428C>T<br>c.5882G>A                            | p.(Pro143Leu)<br>p.(Gly1961Glu)                                    | HET<br>HET               | rs62646860<br>rs1800553                       | P<br>P                     | AR           | 3<br>4              |
| CD/CRD-14 | F   | 52  | CD            | 5     | ABCA4                            | NM_000350 | ex4                          | c.428C>T                                         | p.(Pro143Leu)                                                      | HOM                      | rs62646860                                    | P                          | AR           | 3                   |
| CD/CRD-15 | M   | 28  | CRD           | 6     | ABCA4<br>ABCA4                   | NM_000350 | ex43<br>ex22                 | c.5917del<br>c.3259G>A                           | p.(Val1973*)<br>p.(Glu1087Lys)                                     | HET<br>HET               | rs61751389<br>rs61751398                      | P<br>P                     | AR           | 5<br>4              |
| CD/CRD-16 | M   | 40  | CD            | 12    | ABCA4<br>ABCA4<br>ABCA4          | NM_000350 | int35<br>ex42<br>ex16        | c.5018+2T>C<br>c.5882G>A<br>c.2549A>G            | p.(?)<br>p.(Gly1961Glu)<br>p.(Tyr850Cys)                           | HET<br>HET<br>HET        | rs61750562<br>rs1800553<br>rs143797418        | P<br>P<br>LP               | AR           | 16<br>4<br>13       |
| CD/CRD-17 | M   | 24  | CD            | 11    | ABCA4<br>ABCA4                   | NM_000350 | ex8<br>ex17                  | c.1085_1086del<br>c.2624T>C                      | p.(Tyr362*)<br>p.(Leu875Pro)                                       | HET<br>HET               | NA<br>NA                                      | P<br>VUS/LP                | AR           | NEW<br>NEW          |
| CD/CRD-18 | F   | 63  | CRD           | 9     | ABCA4<br>ABCA4                   | NM_000350 | ex47<br>ex23                 | c.6445C>T<br>c.(3192-90_3418)_(3418_3562)dup     | p.(Arg2149*)<br>p.(?)                                              | HET<br>HET               | rs61750654<br>NA                              | P<br>P                     | AR           | 6<br>NEW            |
| CD/CRD-19 | F   | 52  | CRD           | 30    | ABCA4<br>ABCA4                   | NM_000350 | int13<br>ex42                | c.1937+1G>A<br>c.5882G>A                         | p.(?)<br>p.(Gly1961Glu)                                            | HET<br>HET               | rs61752401<br>rs1800553                       | P<br>P                     | AR           | 5<br>4              |
| CD/CRD-20 | M   | 59  | CD            | 12    | ABCA4<br>ABCA4                   | NM_000350 | ex43<br>int40                | c.5959_5964delinsTG<br>c.5714+5G>A               | p.(Gly1987*)<br>p.(Glu1863Leufs*33)                                | HET<br>HET               | NA<br>rs61751407                              | P<br>P                     | AR           | NEW<br>28           |
| CD/CRD-21 | M   | 9   | CRD           | 1     | ADAM9                            | NM_003816 | ex8                          | c.725T>G                                         | p.(Leu242Arg)                                                      | HOM                      | NA                                            | VUS/LP                     | AR           | NEW                 |
| CD/CRD-22 | M   | 29  | CRD           | 1     | BEST1                            | NM_004183 | ex4                          | c.318dup                                         | p.(Met107Hisfs*125)                                                | HET                      | NA                                            | P                          | AD           | NEW                 |
| CD/CRD-23 | M   | 47  | CRD           | 19    | CACNA1F                          | NM_005183 | int23                        | c.2874-1G>C                                      | p.(?)                                                              | HEM                      | NA                                            | P                          | XL           | NEW                 |
| CD/CRD-24 | M   | 22  | CRD           | 3     | CACNA1F                          | NM_005183 | ex23                         | c.2804_2806del                                   | p.(Phe935del)                                                      | HEM                      | rs782068089                                   | VUS/LP                     | XL           | NEW                 |
| CD/CRD-25 | F   | 48  | CRD           | 44    | CDHR1<br>CDHR1                   | NM_033100 | ex8<br>ex13                  | c.783G>A<br>c.1373T>A                            | p.(Pro261=)<br>p.(Val458Asp)                                       | HET<br>HET               | rs147346345<br>rs760942217                    | VUS/LP<br>VUS/LP           | AR           | 42<br>43            |
| CD/CRD-26 | M   | 52  | CRD           | 28    | CDHR1<br>CDHR1                   | NM_033100 | ex17<br>ex8                  | c.2522_2528del<br>c.783G>A                       | p.(Ile841Serfs*119)<br>p.(Pro261=)                                 | HET<br>HET               | rs794727197<br>rs147346345                    | P<br>VUS/LP                | AR           | 44<br>42            |

|                  |   |    |     |    |               |              |       |                    |                               |     |              |        |    |     |
|------------------|---|----|-----|----|---------------|--------------|-------|--------------------|-------------------------------|-----|--------------|--------|----|-----|
| CD/CRD-27        | M | 70 | CRD | 62 | <i>CFH</i>    | NM_000186    | ex16  | c.2440C>T          | p.(Pro814Ser)                 | HET | NA           | VUS/LP | AD | NEW |
| CD/CRD-28        | F | 39 | CD  | 1  | CNGA3         | NM_001298    | ex7   | c.572G>A           | p.(Cys191Tyr)                 | HET | rs761554853  | P      | AR | 45  |
|                  |   |    |     |    | CNGA3         |              | ex8   | c.848G>A           | p.(Arg283Gln)                 | HET | rs104893614  | P      | AR | 45  |
| <b>CD/CRD-29</b> | F | 15 | CD  | NA | CNGA3         | NM_001298    | ex8   | c.1279C>T          | p.(Arg427Cys)                 | HET | rs141386891  | P      | AR | 46  |
|                  |   |    |     |    | CNGA3         |              | ex8   | c.940_942del       | p.(Ile314del)                 | HET | rs777878533  | P      | AR | 46  |
| <b>CD/CRD-30</b> | F | 39 | CD  | 7  | CNGB3         | NM_019098    | ex10  | c.1148del          | p.(Thr383Ilefs*13)            | HOM | rs397515360  | P      | AR | 47  |
| CD/CRD-31        | F | 44 | CD  | 6  | CNGB3         | NM_019098    | ex2   | c.143del           | p.(Gly48Valfs*35)             | HOM | NA           | LP     | AR | NEW |
| CD/CRD-32        | F | 29 | CRD | 6  | <i>CRB1</i>   | NM_201253    | ex7   | c.2149G>T          | p.(Gly717Cys)                 | HET | NA           | LP     | AD | NEW |
| CD/CRD-33        | F | 60 | CD  | 52 | <i>CRX</i>    | NM_000554    | ex3   | c.166G>A           | p.(Ala56Thr)                  | HET | rs61748437   | LP     | AD | 48  |
| CD/CRD-34        | M | 68 | CRD | 56 | <i>CRX</i>    | NM_000554    | ex4   | c.329del           | p.(Gly110Alafs*77)            | HET | rs761108522  | P      | AD | NEW |
| CD/CRD-35        | F | 56 | CRD | 20 | <i>GUCA1A</i> | NM_000409    | ex4   | c.312_313delinsGC  | p.(Asn104_Gly105delinsLysArg) | HET | NA           | VUS/LP | AD | NEW |
| CD/CRD-36        | M | 51 | CRD | 18 | <i>GUCY2D</i> | NM_000180    | ex13  | c.2512C>T          | p.(Arg838Cys)                 | HET | rs61750172   | P      | AD | 49  |
| CD/CRD-37        | M | 43 | CD  | 25 | <i>GUCY2D</i> | NM_000180    | ex13  | c.2512 C>T         | p.(Arg838Cys)                 | HOM | rs61750172   | P      | AR | 49  |
| <b>CD/CRD-38</b> | F | 12 | CD  | 5  | <i>GUCY2D</i> | NM_000180    | ex13  | c.2512C>T          | p.(Arg838Cys)                 | HET | rs61750172   | P      | AD | 49  |
| <b>CD/CRD-39</b> | M | 77 | CD  | 65 | <i>GUCY2D</i> | NM_000180    | ex2   | c.286T>C           | p.(Phe96Leu)                  | HET | NA           | VUS/LP | AD | NEW |
| CD/CRD-40        | M | 26 | CD  | 3  | <i>GUCY2D</i> | NM_000180    | ex13  | c.2546C>G          | p.(Thr849Arg)                 | HET | NA           | LP     | AD | NEW |
| <b>CD/CRD-41</b> | F | 47 | CRD | 35 | <i>IMPG2</i>  | NM_016247    | ex2   | c.283G>C           | p.(Glu95Gln)                  | HET | rs1198094357 | VUS/LP | AD | NEW |
| CD/CRD-42        | F | 39 | CD  | 14 | <i>KCNV2</i>  | NM_133497    | ex2   | c.1381G>T          | p.(Gly461*)                   | HOM | rs149648640  | P      | AR | 50  |
| CD/CRD-43        | F | 30 | CD  | 3  | <i>KCNV2</i>  | NM_133497    | ex2   | c.1427T>G          | p.(Leu476Arg)                 | HOM | rs796658305  | LP     | AR | NEW |
| CD/CRD-44        | M | 40 | CD  | 31 | <i>PDE6C</i>  | NM_006204    | int20 | c.2367+1_2367+5del | p.(?)                         | HET | rs796051871  | P      | AR | NEW |
|                  |   |    |     |    | <i>PDE6C</i>  |              | ex17  | c.2087C>T          | p.(Thr696Met)                 | HET | rs41290222   | VUS/LP | AR | NEW |
| CD/CRD-45        | M | 57 | CRD | 25 | <i>POC1B</i>  | NM_172240    | ex4   | c.317G>C           | p.(Arg106Pro)                 | HET | rs76216585   | LP     | AR | 51  |
|                  |   |    |     |    | <i>POC1B</i>  |              | ex6   | c.587C>T           | p.(Pro196Leu)                 | HET | NA           | VUS/LP | AR | NEW |
| CD/CRD-46        | M | 68 | CD  | 30 | <i>PRPH2</i>  | NM_000322    | ex2   | c.621C>A           | p.(Asp207Glu)                 | HET | NA           | LP     | AD | NEW |
| CD/CRD-47        | F | 52 | CD  | 40 | <i>PRPH2</i>  | NM_000322    | ex1   | c.514C>T           | p.(Arg172Trp)                 | HET | rs61755792   | P      | AD | 39  |
| <b>CD/CRD-48</b> | F | 63 | CD  | 10 | <i>PRPH2</i>  | NM_000322    | ex1   | c.568A>G           | p.(Lys190Glu)                 | HET | NA           | VUS/LP | AD | NEW |
| CD/CRD-49        | F | 64 | CD  | 7  | <i>RAB28</i>  | NM_001017979 | ex4   | c.321G>A           | p.(Trp107*)                   | HET | NA           | P      | AD | 52  |
| <b>CD/CRD-50</b> | M | 62 | CRD | 16 | <i>RPGR</i>   | NM_001034853 | ex15  | c.3178_3179del     | p.(Glu1060Argfs*18)           | HEM | rs771214648  | P      | XL | 53  |
| <b>CD/CRD-51</b> | M | 46 | CD  | 25 | <i>RPGR</i>   | NM_001034853 | ex15  | c.3317dup          | p.(Ser1107Valfs*4)            | HEM | rs886041376  | P      | XL | 54  |
| <b>CD/CRD-52</b> | M | 37 | CRD | 24 | <i>RPGR</i>   | NM_001034853 | ex15  | c.2236_2237del     | p.(Glu746Argfs*23)            | HEM | rs1555961852 | P      | XL | 55  |
| <b>CD/CRD-53</b> | M | 24 | CRD | 12 | <i>TTL5</i>   | NM_015072    | ex13  | c.1060G>A          | p.(Val354Met)                 | HOM | rs781509883  | VUS/LP | AR | NEW |
| CD/CRD-54        | M | 71 | CRD | 60 | <i>TTL5</i>   | NM_015072    | ex17  | c.1442G>C          | p.(Gly481Ala)                 | HOM | rs771482604  | VUS/LP | AR | NEW |
| CD/CRD-55        | M | 41 | CRD | 34 | <i>TTL5</i>   | NM_015072    | ex10  | c.800T>C           | p.(Leu267Pro)                 | HOM | NA           | VUS/LP | AR | NEW |
| CD/CRD-56        | F | 7  | CRD | 1  | <i>TULP1</i>  | NM_003322    | ex10  | c.901C>T           | p.(Gln301*)                   | HET | rs201070350  | P      | AR | 56  |
|                  |   |    |     |    | <i>TULP1</i>  |              | ex8   | c.822G>T           | p.(Lys274Asn)                 | HET | NA           | P      | AR | NEW |

Legend: AD, autosomal dominant; AR, autosomal recessive; XL, X-linked; HET, heterozygous; HOM, homozygous; HEM, hemizygous; F, female; M, male; ex, exon; int, intron; in **bold**, segregation performed; in *italics*, *in cis* variants; NA, not available; UNK, unknown; VUS, variant of unknown significance; LP, likely pathogenic; P, pathogenic.



1. Maugeri, A. *et al.* Mutations in the ABCA4 (ABCR) gene are the major cause of autosomal recessive cone-rod dystrophy. *Am J Hum Genet.* **67**, 960-966 (2000).
2. Allikmets, R., Zernant, J., Lee, W. Penetrance of the ABCA4 p.Asn1868Ile Allele in Stargardt Disease. *Invest Ophthalmol Vis Sci.* **59**, 5564-5565 (2018).
3. Jaakson, K. *et al.* Genotyping microarray (gene chip) for the ABCR (ABCA4) gene. *Hum Mutat.* **22**, 395-403 (2003).
4. Allikmets, R. *et al.* A photoreceptor cell-specific ATP-binding transporter gene (ABCR) is mutated in recessive Stargardt macular dystrophy. *Nat Genet.* **15**, 236-246 (1997).
5. Rivera, A. *et al.* A comprehensive survey of sequence variation in the ABCA4 (ABCR) gene in Stargardt disease and age-related macular degeneration. *Am J Hum Genet.* **67**, 800-813 (2000).
6. Lewis, R.A. *et al.* Genotype/Phenotype analysis of a photoreceptor-specific ATP-binding cassette transporter gene, ABCR, in Stargardt disease. *Am J Hum Genet.* **64**, 422-434 (1999).
7. Schulz, H.L. *et al.* Mutation Spectrum of the ABCA4 Gene in 335 Stargardt Disease Patients From a Multicenter German Cohort-Impact of Selected Deep Intronic Variants and Common SNPs. *Invest Ophthalmol Vis Sci.* **58**, 394-403 (2017).
8. Nassisi, M. *et al.* Expanding the Mutation Spectrum in ABCA4: Sixty Novel Disease Causing Variants and Their Associated Phenotype in a Large French Stargardt Cohort. *Int J Mol Sci.* **19**, 2196 (2018).
9. Stenirri, S. *et al.* Denaturing HPLC profiling of the ABCA4 gene for reliable detection of allelic variations. *Clin Chem.* **50**, 1336-1343 (2004).

10. Simonelli, F. *et al.* New ABCR mutations and clinical phenotype in Italian patients with Stargardt disease. *Invest Ophthalmol Vis Sci.* **41**, 892-897 (2000).
11. Sodi, A. *et al.* Different patterns of fundus autofluorescence related to ABCA4 gene mutations in Stargardt disease. *Ophthalmic Surg Lasers Imaging.* **41**, 48-53 (2010).
12. Fumagalli, A. *et al.* Mutational scanning of the ABCR gene with double-gradient denaturing-gradient gel electrophoresis (DG-DGGE) in Italian Stargardt disease patients. *Hum Genet.* **109**, 326-338 (2001).
13. Oldani, M. *et al.* Clinical and molecular genetic study of 12 Italian families with autosomal recessive Stargardt disease. *Genet Mol Res.* **11**, 4342-4350 (2012).
14. Gerber, S. *et al.* Complete exon-intron structure of the retina-specific ATP binding transporter gene (ABCR) allows the identification of novel mutations underlying Stargardt disease. *Genomics.* **48**, 139-142 (1998).
15. Stenirri, S. *et al.* Are microarrays useful in the screening of ABCA4 mutations in Italian patients affected by macular degenerations? *Clin Chem Lab Med.* **46**, 1250-1255 (2008).
16. Cideciyan, A.V. *et al.* ABCA4 disease progression and a proposed strategy for gene therapy. *Hum Mol Genet.* **18**, 931-941 (2009).
17. Rozet, J.M. *et al.* Spectrum of ABCR gene mutations in autosomal recessive macular dystrophies. *Eur J Hum Genet.* **6**, 291-295 (1998).
18. Zaneveld, J. *et al.* Comprehensive analysis of patients with Stargardt macular dystrophy reveals new genotype-phenotype correlations and unexpected diagnostic revisions. *Genet Med.* **17**, 262-270 (2015).

19. Sodi, A. *et al.* En face OCT in Stargardt disease. *Graefes Arch Clin Exp Ophthalmol.* **254**, 1669-1679 (2016).
20. Fishman, G.A. *et al.* Variation of clinical expression in patients with Stargardt dystrophy and sequence variations in the ABCR gene. *Arch Ophthalmol.* **117**, 504-510 (1999).
21. Birch, D.G. *et al.* Visual function in patients with cone-rod dystrophy (CRD) associated with mutations in the ABCA4(ABCR) gene. *Exp Eye Res.* **73**, 877-886 (2001).
22. Riveiro-Alvarez, R. *et al.* Frequency of ABCA4 mutations in 278 Spanish controls: an insight into the prevalence of autosomal recessive Stargardt disease. *Br J Ophthalmol.* **93**, 1359-1364 (2009).
23. Fujinami, K. *et al.* ABCA4 gene screening by next-generation sequencing in a British cohort. *Invest Ophthalmol Vis Sci.* **54**, 6662-6674 (2013).
24. Abed, E. *et al.* Correlation of Macular Focal Electroretinogram with Ellipsoid Zone Extension in Stargardt Disease. *J Ophthalmol.* **2017**, 3643495 (2017).
25. Hu, F.Y. *et al.* ABCA4 Gene Screening in a Chinese Cohort With Stargardt Disease: Identification of 37 Novel Variants. *Front Genet.* **10**, 773 (2019).
26. Cremers, F.P. *et al.* Autosomal recessive retinitis pigmentosa and cone-rod dystrophy caused by splice site mutations in the Stargardt's disease gene ABCR. *Hum Mol Genet.* **7**, 355-362 (1998).
27. Abed, E. *et al.* Early impairment of the full-field photopic negative response in patients with Stargardt disease and pathogenic variants of the ABCA4 gene. *Clin Exp Ophthalmol.* **46**, 519-530 (2018).

28. Sangermano, R. *et al.* ABCA4 midigenes reveal the full splice spectrum of all reported noncanonical splice site variants in Stargardt disease. *Genome Res.* **28**, 100-110 (2018).
29. Paavo, M. *et al.* Mutations in GPR143/OA1 and ABCA4 Inform Interpretations of Short-Wavelength and Near-Infrared Fundus Autofluorescence. *Invest Ophthalmol Vis Sci.* **59**, 2459-2469 (2018).
30. Rossi, S. *et al.* Subretinal Fibrosis in Stargardt's Disease with Fundus Flavimaculatus and ABCA4 Gene Mutation. *Case Rep Ophthalmol.* **3**, 410-417 (2012).
31. Fujinami, K. *et al.* Clinical and molecular characteristics of childhood-onset Stargardt disease. *Ophthalmology.* **122**, 326-334 (2015).
32. Gao, T. *et al.* Clinical and Mutation Analysis of Patients with Best Vitelliform Macular Dystrophy or Autosomal Recessive Bestrophinopathy in Chinese Population. *Biomed Res Int.* **2018**, 4582816 (2018).
33. Frecer, V. *et al.* Pathogenicity of new BEST1 variants identified in Italian patients with best vitelliform macular dystrophy assessed by computational structural biology. *J Transl Med.* **17**, 330 (2019).
34. Bakall, B. *et al.* The mutation spectrum of the bestrophin protein--functional implications. *Hum Genet.* **104**, 383-389 (1999).
35. Querques, G. *et al.* The spectrum of subclinical Best vitelliform macular dystrophy in subjects with mutations in BEST1 gene. *Invest Ophthalmol Vis Sci.* **52**, 4678-4684 (2011).
36. Alapati, A. *et al.* Molecular diagnostic testing by eyeGENE: analysis of patients with hereditary retinal dystrophy phenotypes involving central vision loss. *Invest Ophthalmol Vis Sci.* **55**, 5510-5521 (2014).

37. Jespersgaard, C. *et al.* Molecular genetic analysis using targeted NGS analysis of 677 individuals with retinal dystrophy. *Sci Rep.* **9**, 1219 (2019).
38. Strafella, C. *et al.* NGS Analysis for Molecular Diagnosis of Retinitis Pigmentosa (RP): Detection of a Novel Variant in PRPH2 Gene. *Genes (Basel).* **10**, 792 (2019).
39. Wells, J. *et al.* Mutations in the human retinal degeneration slow (RDS) gene can cause either retinitis pigmentosa or macular dystrophy. *Nat Genet.* **3**, 213-218 (1993).
40. Testa, F. *et al.* A novel mutation in the RDS gene in an Italian family with pattern dystrophy. *Br J Ophthalmol.* **89**, 1066-1068 (2005).
41. Michaelides, M. *et al.* ABCA4 mutations and discordant ABCA4 alleles in patients and siblings with bull's-eye maculopathy. *Br J Ophthalmol.* **91**, 1650-1655 (2007).
42. Glöckle, N. *et al.* Panel-based next generation sequencing as a reliable and efficient technique to detect mutations in unselected patients with retinal dystrophies. *Eur J Hum Genet.* **22**, 99-104 (2014).
43. Ba-Abbad, R. *et al.* A clinical study of patients with novel CDHR1 genotypes associated with late-onset macular dystrophy. *Eye (Lond).* **35**, 1482-1489 (2021).
44. Weisschuh, N. *et al.* Mutation Detection in Patients with Retinal Dystrophies Using Targeted Next Generation Sequencing. *PLoS One.* **11**, e0145951 (2016).
45. Muraki-Oda, S. *et al.* Functional analysis of rod monochromacy-associated missense mutations in the CNGA3 subunit of the cone photoreceptor cGMP-gated channel. *Biochem Biophys Res Commun.* **362**, 88-93 (2007).
46. Wissinger, B. *et al.* CNGA3 mutations in hereditary cone photoreceptor disorders. *Am J Hum Genet.* **69**, 722-737 (2001).

47. Sundin, O.H. *et al.* Genetic basis of total colourblindness among the Pingelapese islanders. *Nat Genet.* **25**, 289-293 (2000).
48. Lotery, A.J. *et al.* Mutation analysis of 3 genes in patients with Leber congenital amaurosis. *Arch Ophthalmol.* **118**, 538-543 (2000).
49. Kelsell, R.E. *et al.* Mutations in the retinal guanylate cyclase (RETGC-1) gene in dominant cone-rod dystrophy. *Hum Mol Genet.* **7**, 1179-1184 (1998).
50. Robson, A.G. *et al.* "Cone dystrophy with supernormal rod electroretinogram": a comprehensive genotype/phenotype study including fundus autofluorescence and extensive electrophysiology. *Retina.* **30**, 51-62 (2010).
51. Roosing, S. *et al.* Disruption of the basal body protein POC1B results in autosomal-recessive cone-rod dystrophy. *Am J Hum Genet.* **95**, 131-142 (2014).
52. Iarossi, G. *et al.* Expanding the Clinical and Genetic Spectrum of RAB28-Related Cone-Rod Dystrophy: Pathogenicity of Novel Variants in Italian Families. *Int J Mol Sci.* **22**, 381 (2020).
53. Wang, J. *et al.* Dependable and efficient clinical utility of target capture-based deep sequencing in molecular diagnosis of retinitis pigmentosa. *Invest Ophthalmol Vis Sci.* **55**, 6213-6223 (2014).
54. Thiadens, A.A. *et al.* Clinical course of cone dystrophy caused by mutations in the RPGR gene. *Graefes Arch Clin Exp Ophthalmol.* **249**, 1527-1535 (2011).
55. Vervoort, R. *et al.* Mutational hot spot within a new RPGR exon in X-linked retinitis pigmentosa. *Nat Genet.* **25**, 462-466 (2000).

56. Li, Y. *et al.* Mutation survey of known LCA genes and loci in the Saudi Arabian population. *Invest Ophthalmol Vis Sci.* **50**, 1336-1343 (2009).
